# Supplementary material for: ETV5 overexpression promotes progression of esophageal squamous cell carcinoma by upregulating SKA1 and TRPV2
Source: PubMed Central journal article supplement (PMC9254378; doi:10.7150/ijms.71892), 2022-06-21
Supplement: ijmsv19p1072s1.pdf [file ijmsv19p1072s1.pdf]

Supplementary table 1 Primers for real-time PCR assays

|                    |         |                               |
|--------------------|---------|-------------------------------|
| ETV5               | forward | 5'-CAGCACACGGGTTCCAGTCAC-3'   |
|                    | reverse | 5'-TGGCAGTTAGGCACTTCTGAATCG3' |
| SKA1               | forward | 5'-AGAGGGGAGAGGGGCTGGAG-3'    |
|                    | reverse | 5'-GCGTCACCTTCCTGGCACATG3'    |
| TRPV2              | forward | 5'-GATCGGCTCTTCAATGCGGTCT-3'  |
|                    | reverse | 5'-CGGTGAGGTACTTGCTGGTCTTG3'  |
| SKA1(for<br>CHIP)  | forward | 5'-AGGAAAGGACCCAGGCTTATCG3'   |
|                    | reverse | 5'-ACCGTACTGACTTGTCTTAGAGCG3' |
| TRPV2(for<br>CHIP) | forward | 5'-GGGCTGTCCACATCAGCTTCTCG3'  |
|                    | reverse | 5'-CAGGCTCCACCCACCC-3'        |

Supplementary table 2 The relationship between clinical factors and ETV5 expression

| Clinicopathological factors | ETV5 expression |     |         |
|-----------------------------|-----------------|-----|---------|
|                             | High            | Low | P-value |
| <b>Gender</b>               |                 |     |         |
| Male                        | 36              | 29  | 0.542   |
| Female                      | 9               | 5   |         |
| <b>Age(y)</b>               |                 |     |         |
| ≤60                         | 12              | 14  | 0.174   |
| > 60                        | 33              | 20  |         |
| <b>Tumor size</b>           |                 |     |         |
| ≤3cm                        | 15              | 15  | 1       |
| > 3cm                       | 30              | 30  |         |
| <b>Metastasis*</b>          |                 |     |         |
| Negative                    | 28              | 29  | 0.024   |
| Positive                    | 17              | 5   |         |
| <b>TNM stage</b>            |                 |     |         |
| 0-II                        | 30              | 30  | 0.026   |
| III-IV                      | 15              | 4   |         |

\* Metastasis here includes lymph node metastasis and other organs metastasis.
